# Supplementary material for: Technical Note: An X-ray absorption method for the identification of calcium phosphate species using peak-height ratios
Source: Copernicus journal article supplement (doi:10.5194/bg-11-2169-2014), 2014-04-17
Supplement: Supplementary file 1 [file bg-11-2169-2014-supplement.zip]

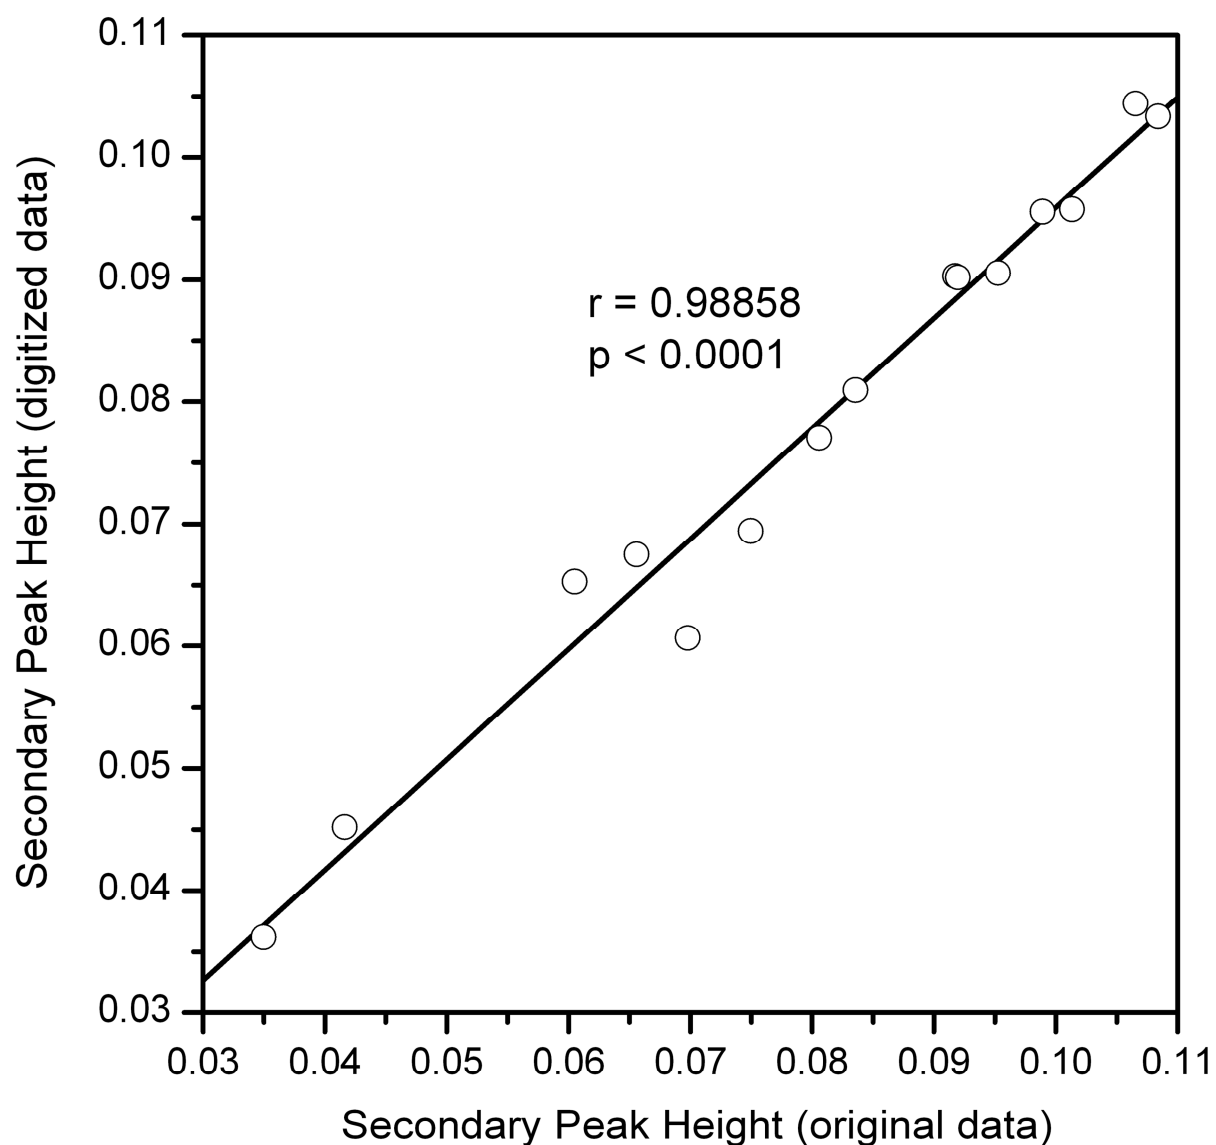

Figure S1. Correlation of secondary peak heights of P K-edge XANES spectra obtained after normalization of raw data and OPR-retrieved data. Secondary peak heights are given as arbitrary units relative to maximum main peak intensities of one. Raw data were taken from supplementary material of Brandes et al. (2007) and Ingall et al. (2011).
