# Supplementary material for: Technical Note: An X-ray absorption method for the identification of calcium phosphate species using peak-height ratios
Source: Copernicus journal article supplement (doi:10.5194/bg-11-2169-2014), 2014-04-17
Supplement: Supplementary file 3 [file bg-11-2169-2014-supplement.zip]

Archive with 2 entries (2 files):
- FigureS1.pdf
- FigureS2.pdf
